# Supplementary material for: Generation of Mature Nα‐Terminal Acetylated Thymosin α1 by Cleavage of Recombinant Prothymosin α
Source: Hindawi journal article supplement (doi:10.1155/2013/387282), 2013-01-01
Supplement: f1 [file 387282.f1.pdf]

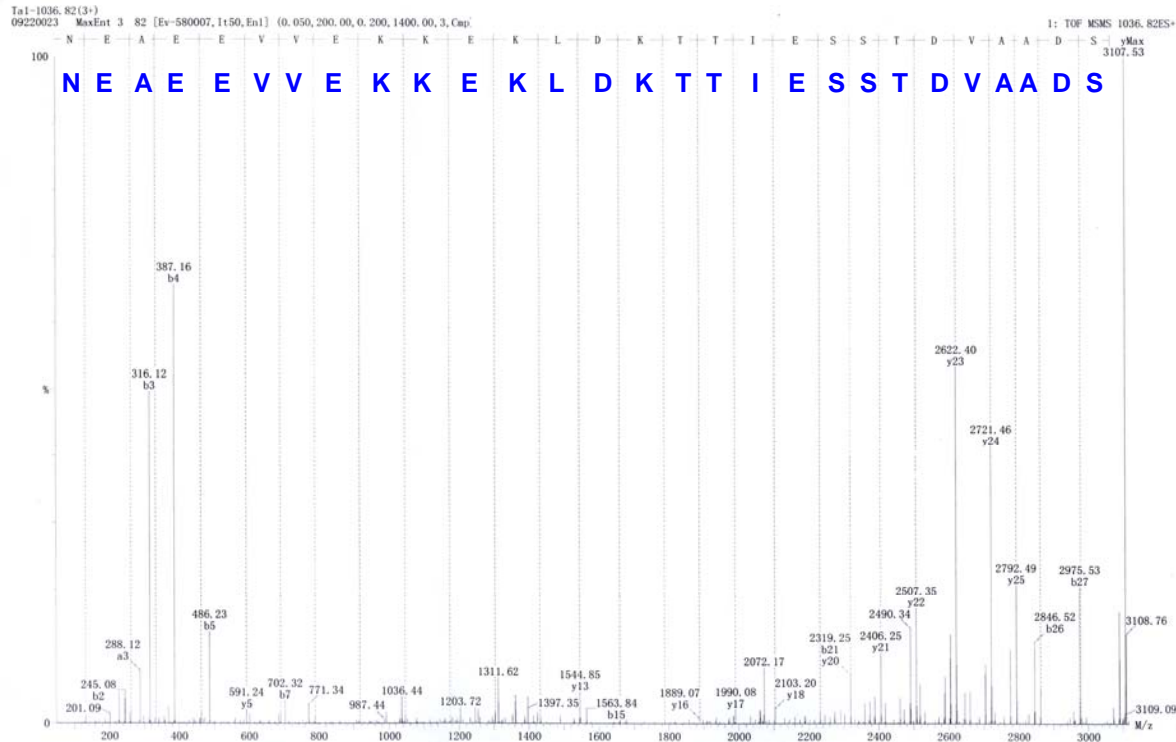

(a)

Observed MW: 3107.4363 Precursor ion charge state: 1  
M/z tolerance: 0.30 Intensity threshold: 0 (0.000%)  
Modifications: Acetylation (+)

|   |         |         |         |         |         |         |         |         |         |         |         |         |         |         |         |         |         |         |         |         |
|---|---------|---------|---------|---------|---------|---------|---------|---------|---------|---------|---------|---------|---------|---------|---------|---------|---------|---------|---------|---------|
| a | 102.06  | 217.08  | 288.12  | 359.16  | 458.23  | 573.25  | 674.30  | 761.33  | 848.36  | 977.41  | 1090.49 | 1191.54 | 1292.59 | 1420.68 | 1535.71 | 1648.79 | 1776.89 | 1905.93 | 2034.02 | 2162.12 |
| b | 130.05  | 245.08  | 316.11  | 387.15  | 486.22  | 601.25  | 702.29  | 789.33  | 876.36  | 1005.40 | 1118.49 | 1219.53 | 1320.58 | 1448.68 | 1563.70 | 1676.79 | 1804.88 | 1933.92 | 2062.02 | 2190.11 |
|   | 0.00    | 0.00    | -0.00   | -0.01   | -0.01   | 0.01    | -0.03   | -0.03   | -0.07   | -0.09   | -0.06   | -0.10   | -0.07   | -0.04   | -0.07   | -0.04   | -0.01   | -0.05   | 0.00    | 0.13    |
|   | 0.00    | 0.00    | -0.00   | -0.01   | -0.01   | -0.02   | -0.03   | -0.04   | -0.09   | -0.07   | -0.03   | -0.03   | -0.09   | -0.13   | -0.13   | -0.17   | -0.29   | -0.02   | -0.03   | -0.02   |
|   | Ser     | Asp     | Ala     | Ala     | Val     | Asp     | Thr     | Ser     | Ser     | Glu     | Ile     | Thr     | Thr     | Lys     | Asp     | Leu     | Lys     | Glu     | Lys     | Lys     |
| y | 3065.50 | 2978.47 | 2863.44 | 2792.41 | 2721.37 | 2622.30 | 2507.27 | 2406.23 | 2319.19 | 2232.16 | 2103.12 | 1990.04 | 1888.99 | 1787.94 | 1659.84 | 1544.82 | 1431.73 | 1303.64 | 1174.60 | 1046.50 |
| x | 3048.47 | 2961.44 | 2846.41 | 2775.38 | 2704.34 | 2605.27 | 2490.24 | 2389.20 | 2302.16 | 2215.13 | 2086.09 | 1973.00 | 1871.96 | 1770.91 | 1642.81 | 1527.79 | 1414.70 | 1286.61 | 1157.57 | 1029.47 |
|   | ---     | -0.03   | -0.04   | -0.08   | -0.09   | -0.10   | -0.08   | -0.02   | -0.06   | -0.10   | -0.08   | -0.05   | -0.08   | -0.04   | -0.14   | -0.04   | -0.01   | -0.09   | -0.04   | -0.04   |
|   | ---     | -0.14   | -0.10   | -0.05   | -0.16   | -0.01   | -0.09   | -0.10   | -0.16   | -0.12   | -0.12   | 0.26    | -0.06   | -0.10   | -0.15   | -0.12   | -0.15   | -0.03   | -0.02   | -0.06   |
| a | 2291.16 | 2390.23 | 2489.30 | 2618.34 | 2747.38 | 2818.42 | 2947.46 | 3061.51 |         |         |         |         |         |         |         |         |         |         |         |         |
| b | 2319.16 | 2418.23 | 2517.29 | 2646.34 | 2775.38 | 2846.42 | 2975.46 | 3089.50 |         |         |         |         |         |         |         |         |         |         |         |         |
|   | 0.17    | 0.12    | 0.07    | 0.03    | -0.13   | -0.03   | -0.04   | ---     |         |         |         |         |         |         |         |         |         |         |         |         |
|   | -0.10   | -0.08   | -0.07   | -0.09   | -0.05   | -0.10   | -0.08   | ---     |         |         |         |         |         |         |         |         |         |         |         |         |
|   | Glu     | Val     | Val     | Glu     | Glu     | Ala     | Glu     | Asn     |         |         |         |         |         |         |         |         |         |         |         |         |
| y | 918.41  | 789.36  | 690.29  | 591.23  | 462.18  | 333.14  | 262.10  | 133.06  |         |         |         |         |         |         |         |         |         |         |         |         |
| x | 901.38  | 772.33  | 673.26  | 574.20  | 445.15  | 316.11  | 245.07  | 116.03  |         |         |         |         |         |         |         |         |         |         |         |         |
|   | -0.02   | -0.01   | -0.02   | -0.01   | -0.01   | -0.00   | -0.00   | 0.00    |         |         |         |         |         |         |         |         |         |         |         |         |
|   | -0.04   | ---     | -0.01   | -0.01   | -0.02   | -0.01   | -0.00   | -0.03   |         |         |         |         |         |         |         |         |         |         |         |         |

(b)
